# Supplementary material for: Impact of Elicitation on Plant Antioxidants Production in Taxus Cell Cultures
Source: MDPI journal article supplement (doi:10.3390/antiox12040887), 2023-04-05
Supplement: s1 [file s1]

## Supplementary material.

### **Impact of Elicitation on Plant Antioxidants Production in Taxus Cell Cultures**

Edgar Perez-Matas<sup>1</sup>, Pascual Garcia-Perez<sup>2,3</sup>, Mercedes Bonfill<sup>1</sup>, Luigi Lucini<sup>2</sup>, Diego Hidalgo-Martinez<sup>1,\*</sup> and Javier Palazon<sup>1,\*</sup>

<sup>1</sup> Department of Biology, Healthcare and the Environment, Faculty of Pharmacy and Food Sciences, University of Barcelona, 08028 Barcelona, Spain

<sup>2</sup> Department for Sustainable Food Process, Università Cattolica Del Sacro Cuore, Via Emilia Parmense 84, 29122 Piacenza, Italy

<sup>3</sup> Nutrition and Bromatology Group, Department of Analytical and Food Chemistry, Faculty of Food Science and Technology, Ourense Campus, Universidade de Vigo, 32004 Ourense, Spain

\* Correspondence: dhidalgo@ub.edu (D.H.-M.); javierpalazon@ub.edu (J.P.)

Table S1. Phenolic compound list.

| Compound                                 | Class             | Subclass         | Retention Time (min) | Mass   | Formula     |
|------------------------------------------|-------------------|------------------|----------------------|--------|-------------|
| Cyanidin                                 | Flavonoids        | Anthocyanins     | 1.79                 | 287.05 | C15 H11 O6  |
| Cyanidin 3-O-(6''-p-coumaroyl-glucoside) | Flavonoids        | Anthocyanins     | 3.71                 | 595.13 | C30 H27 O13 |
| (+)-Catechin                             | Flavonoids        | Flavanols        | 5.37                 | 290.08 | C15 H14 O6  |
| (+)-Gallocatechin                        | Flavonoids        | Flavanols        | 4.20                 | 306.07 | C15 H14 O7  |
| Procyanidin dimer B1                     | Flavonoids        | Flavanols        | 4.56                 | 578.14 | C30 H26 O12 |
| Procyanidin trimer C1                    | Flavonoids        | Flavanols        | 4.58                 | 866.20 | C45 H38 O18 |
| Prodelphinidin dimer B3                  | Flavonoids        | Flavanols        | 3.24                 | 610.12 | C30 H26 O14 |
| Prodelphinidin trimer C-GC-C             | Flavonoids        | Flavanols        | 3.94                 | 882.19 | C45 H38 O19 |
| (+)-Gallocatechin 3-O-gallate            | Flavonoids        | Flavanols        | 3.08                 | 458.10 | C22 H18 O11 |
| Prodelphinidin trimer GC-GC-C            | Flavonoids        | Flavanols        | 3.23                 | 898.18 | C45 H38 O20 |
| Butein                                   | Flavonoids        | Chalcones        | 9.56                 | 272.06 | C15 H12 O5  |
| Phloretin                                | Flavonoids        | Dihydrochalcones | 7.79                 | 274.08 | C15 H14 O5  |
| 6-Prenylnaringenin                       | Flavonoids        | Flavanones       | 7.12                 | 340.13 | C20 H20 O5  |
| Eriodictyol                              | Flavonoids        | Flavanones       | 6.92                 | 288.06 | C15 H12 O6  |
| Naringenin 7-O-glucoside                 | Flavonoids        | Flavanones       | 7.88                 | 434.12 | C21 H22 O10 |
| Pinocembrin                              | Flavonoids        | Flavanones       | 6.02                 | 256.07 | C15 H12 O4  |
| Apigenin 6-C-glucoside                   | Flavonoids        | Flavones         | 4.97                 | 432.10 | C21 H20 O10 |
| Gardenin B                               | Flavonoids        | Flavones         | 6.26                 | 358.11 | C19 H18 O7  |
| Tetramethylscutellarein                  | Flavonoids        | Flavones         | 1.25                 | 342.11 | C19 H18 O6  |
| 6''-O-Acetylglycitin                     | Flavonoids        | Isoflavonoids    | 7.54                 | 488.12 | C24 H24 O11 |
| Xanthohumol                              | Flavonoids        | Chalcones        | 5.33                 | 354.15 | C21 H22 O5  |
| Luteolin 7-O-(2-apiosyl-glucoside)       | Flavonoids        | Flavones         | 19.70                | 580.13 | C26 H28 O15 |
| 6''-O-Malonyldaidzin                     | Flavonoids        | Isoflavonoids    | 3.84                 | 502.13 | C24 H22 O12 |
| 3-Hydroxyphloretin 2'-O-glucoside        | Flavonoids        | Dihydrochalcones | 12.50                | 452.14 | C21 H24 O11 |
| Sinensetin                               | Flavonoids        | Flavones         | 11.05                | 372.12 | C20 H20 O7  |
| Quercetin 3-O-xylosyl-glucuronide        | Flavonoids        | Flavanols        | 2.80                 | 610.12 | C26 H26 O17 |
| Dihydroquercetin 3-O-rhamnoside          | Flavonoids        | Dihydroflavanols | 6.91                 | 450.11 | C21 H22 O11 |
| Dihydromyricetin 3-O-rhamnoside          | Flavonoids        | Dihydroflavanols | 2.50                 | 466.12 | C21 H22 O12 |
| 7-Hydroxymatairesinol                    | Lignans           | Lignans          | 7.12                 | 374.14 | C20 H22 O7  |
| Anhydro-secoisolariciresinol             | Lignans           | Lignans          | 8.97                 | 344.16 | C20 H24 O5  |
| Cyclolariciresinol                       | Lignans           | Lignans          | 7.86                 | 360.15 | C20 H24 O6  |
| Episesaminol                             | Lignans           | Lignans          | 8.97                 | 370.10 | C20 H18 O7  |
| Sesamol                                  | Lignans           | Lignans          | 5.32                 | 138.03 | C7 H6 O3    |
| Lariciresinol-sesquilignan               | Lignans           | Lignans          | 21.84                | 556.24 | C30 H36 O10 |
| Conidendrin                              | Lignans           | Lignans          | 9.22                 | 356.12 | C20 H20 O6  |
| 1-Acetoxypinoresinol                     | Lignans           | Lignans          | 2.56                 | 416.15 | C22 H24 O8  |
| 4-Ethylcatechol                          | Other polyphenols | Alkylphenols     | 6.54                 | 138.07 | C8 H10 O2   |
| Bergapten                                | Other polyphenols | Furanocoumarins  | 9.46                 | 216.04 | C12 H8 O4   |
| Coumarin                                 | Other polyphenols | Hydroxycoumarins | 6.92                 | 146.03 | C9 H6 O2    |
| Esculetin                                | Other polyphenols | Hydroxycoumarins | 7.59                 | 178.02 | C9 H6 O4    |
| Esculin                                  | Other polyphenols | Hydroxycoumarins | 4.65                 | 340.08 | C15 H16 O9  |

| Compound                            | Class             | Subclass               | Retention Time (min) | Mass   | Formula      |
|-------------------------------------|-------------------|------------------------|----------------------|--------|--------------|
| 2-Methoxy-5-prop-1-enylphenol       | Other polyphenols | Hydroxyphenylpropenes  | 1.21                 | 164.09 | C10 H12 O2   |
| Anethole                            | Other polyphenols | Hydroxyphenylpropenes  | 2.56                 | 148.09 | C10 H12 O    |
| [6]-Gingerol                        | Other polyphenols | Hydroxyphenylpropenes  | 18.62                | 300.23 | C17 H32 O4   |
| Pyrogallol                          | Other polyphenols | Other polyphenols      | 9.50                 | 126.03 | C6 H6 O3     |
| Carnosic acid                       | Other polyphenols | Phenolic terpenes      | 13.66                | 332.19 | C20 H28 O4   |
| Carnosol                            | Other polyphenols | Phenolic terpenes      | 11.38                | 330.18 | C20 H26 O4   |
| Epirosmanol                         | Other polyphenols | Phenolic terpenes      | 11.60                | 346.17 | C20 H26 O5   |
| 3,4-DHPEA-EDA                       | Other polyphenols | Tyrosols               | 16.29                | 320.13 | C17 H20 O6   |
| Hydroxytyrosol                      | Other polyphenols | Tyrosols               | 10.02                | 154.06 | C8 H10 O3    |
| Ligstroside                         | Other polyphenols | Tyrosols               | 6.93                 | 524.18 | C25 H32 O12  |
| Ligstroside-aglycone                | Other polyphenols | Tyrosols               | 14.85                | 362.14 | C19 H22 O7   |
| <i>p</i> -HPEA-AC                   | Other polyphenols | Tyrosols               | 2.19                 | 180.08 | C10 H12 O3   |
| Carvacrol                           | Other polyphenols | Phenolic terpenes      | 8.48                 | 150.10 | C10 H14 O    |
| 4-Ethylguaiaicol                    | Other polyphenols | Alkylmethoxyphenols    | 7.05                 | 152.08 | C9 H12 O2    |
| 4-Vinylguaiaicol                    | Other polyphenols | Alkylmethoxyphenols    | 4.95                 | 150.07 | C9 H10 O2    |
| 4-Hydroxycoumarin                   | Other polyphenols | Hydroxycoumarins       | 13.48                | 162.03 | C9 H6 O3     |
| 3,4-Dihydroxyphenylglycol           | Other polyphenols | Other polyphenols      | 4.98                 | 170.06 | C8 H10 O4    |
| Scopoletin                          | Other polyphenols | Hydroxycoumarins       | 4.97                 | 192.04 | C10 H8 O4    |
| <i>p</i> -Anisaldehyde              | Other polyphenols | Hydroxybenzaldehydes   | 3.17                 | 136.06 | C8 H8 O2     |
| Syringaldehyde                      | Other polyphenols | Hydroxybenzaldehydes   | 1.21                 | 182.06 | C9 H10 O4    |
| 4-Hydroxybenzoic acid 4-O-glucoside | Phenolic acids    | Hydroxybenzoic acids   | 5.09                 | 300.08 | C13 H16 O8   |
| Vanillic acid                       | Phenolic acids    | Hydroxybenzoic acids   | 1.07                 | 168.04 | C8 H8 O4     |
| 3- <i>p</i> -Coumaroylquinic acid   | Phenolic acids    | Hydroxycinnamic acids  | 4.67                 | 338.09 | C16 H18 O8   |
| 5-5'-Dehydrodiferulic acid          | Phenolic acids    | Hydroxycinnamic acids  | 6.13                 | 386.09 | C20 H18 O8   |
| Avenanthramide 2p                   | Phenolic acids    | Hydroxycinnamic acids  | 7.52                 | 299.08 | C16 H13 N O5 |
| Ferulic acid                        | Phenolic acids    | Hydroxycinnamic acids  | 9.46                 | 194.06 | C10 H10 O4   |
| Ferulic acid 4-O-glucoside          | Phenolic acids    | Hydroxycinnamic acids  | 7.12                 | 356.11 | C16 H20 O9   |
| Feruloyl tartaric acid              | Phenolic acids    | Hydroxycinnamic acids  | 2.94                 | 326.06 | C14 H14 O9   |
| Hydroxycaffeic acid                 | Phenolic acids    | Hydroxycinnamic acids  | 1.21                 | 196.04 | C9 H8 O5     |
| <i>p</i> -Coumaric acid ethyl ester | Phenolic acids    | Hydroxycinnamic acids  | 7.21                 | 192.07 | C11 H12 O3   |
| Rosmarinic acid                     | Phenolic acids    | Hydroxycinnamic acids  | 1.23                 | 360.09 | C18 H16 O8   |
| Sinapic acid                        | Phenolic acids    | Hydroxycinnamic acids  | 1.72                 | 224.07 | C11 H12 O5   |
| Sinapine                            | Phenolic acids    | Hydroxycinnamic acids  | 16.06                | 310.17 | C16 H24 N O5 |
| 4-Hydroxybenzaldehyde               | Other polyphenols | Hydroxybenzaldehydes   | 5.47                 | 122.03 | C7 H6 O2     |
| Caffeic acid 4-O-glucoside          | Phenolic acids    | Hydroxycinnamic acids  | 5.93                 | 342.09 | C15 H18 O9   |
| <i>p</i> -Coumaroyl tartaric acid   | Phenolic acids    | Hydroxycinnamic acids  | 1.96                 | 296.05 | C13 H12 O8   |
| Sinapaldehyde                       | Other polyphenols | Hydroxycinnamaldehydes | 13.47                | 208.07 | C11 H12 O4   |
| <i>p</i> -Coumaroyl tyrosine        | Phenolic acids    | Hydroxycinnamic acids  | 5.93                 | 327.12 | C18 H17 N O5 |
| Piceatannol                         | Stilbenes         | Stilbenes              | 15.19                | 244.07 | C14 H12 O4   |
| d-Viniferin                         | Stilbenes         | Stilbenes              | 4.35                 | 454.14 | C28 H22 O6   |
| Pterostilbene                       | Stilbenes         | Stilbenes              | 5.08                 | 256.12 | C16 H16 O3   |
| Resveratrol 3-O-glucoside           | Stilbenes         | Stilbenes              | 11.06                | 390.13 | C20 H22 O8   |

Table S2. Selected VIP markers at 8 days

| Compound Name                       | Class             | Subclass              | VIP score | SE   | logFC (COR vs Control) | logFC (SA vs Control) |
|-------------------------------------|-------------------|-----------------------|-----------|------|------------------------|-----------------------|
| 4-Hydroxybenzoic acid 4-O-glucoside | Phenolic acids    | Hydroxybenzoic acids  | 1.37      | 0.17 | -6.95                  | 2.87                  |
| Carvacrol                           | Other polyphenols | Phenolic terpenes     | 1.36      | 0.45 | 0.00                   | 9.39                  |
| Piceatannol                         | Stilbenes         | Stilbenes             | 1.33      | 0.16 | -0.21                  | -2.49                 |
| 3- <i>p</i> -Coumaroylquinic acid   | Phenolic acids    | Hydroxycinnamic acids | 1.33      | 0.19 | -1.61                  | -2.91                 |
| Carnosic acid                       | Other polyphenols | Phenolic terpenes     | 1.30      | 0.40 | 4.63                   | 6.26                  |
| 4-Ethylcatechol                     | Other polyphenols | Alkylphenols          | 1.24      | 0.20 | -6.95                  | -9.39                 |
| Cyclolariciresinol                  | Lignans           | Lignans               | 1.24      | 0.19 | -6.95                  | -9.39                 |
| Butein                              | Flavonoids        | Chalcones             | 1.11      | 0.15 | -1.91                  | 0.06                  |
| Naringenin 7-O-glucoside            | Flavonoids        | Flavanones            | 1.10      | 0.26 | -1.58                  | 0.01                  |
| [6]-Gingerol                        | Other polyphenols | Hydroxyphenylpropenes | 1.09      | 0.45 | -6.95                  | 0.39                  |
| Tetramethylscutellarein             | Flavonoids        | Flavones              | 1.08      | 0.10 | -1.58                  | -0.88                 |
| Carnosol                            | Other polyphenols | Phenolic terpenes     | 1.08      | 0.33 | -1.06                  | -0.77                 |
| <i>p</i> -HPEA-AC                   | Other polyphenols | Tyrosols              | 1.08      | 0.11 | -3.87                  | 0.03                  |
| Ligstroside                         | Other polyphenols | Tyrosols              | 1.07      | 0.14 | -6.95                  | -0.04                 |
| Rosmarinic acid                     | Phenolic acids    | Hydroxycinnamic acids | 1.06      | 0.16 | -6.95                  | -1.48                 |
| Gardenin B                          | Flavonoids        | Flavones              | 1.05      | 0.07 | 1.90                   | 1.29                  |
| Coumarin                            | Other polyphenols | Hydroxycoumarins      | 1.04      | 0.17 | -6.95                  | -0.13                 |
| Dihydromyricetin 3-O-rhamnoside     | Flavonoids        | Dihydroflavonols      | 1.03      | 0.07 | 6.95                   | 0.00                  |
| 1-Acetoxy-pinorensinol              | Lignans           | Lignans               | 1.03      | 0.09 | 6.95                   | 0.00                  |
| Pinocembrin                         | Flavonoids        | Flavanones            | 1.03      | 0.21 | 0.92                   | 0.63                  |
| Caffeic acid 4-O-glucoside          | Phenolic acids    | Hydroxycinnamic acids | 1.03      | 0.12 | 6.95                   | 0.00                  |
| 6-Prenylnaringenin                  | Flavonoids        | Flavanones            | 1.03      | 0.08 | 1.03                   | 0.52                  |
| Ferulic acid 4-O-glucoside          | Phenolic acids    | Hydroxycinnamic acids | 1.03      | 0.08 | 1.01                   | 0.50                  |
| (+)-Gallic catechin 3-O-gallate     | Flavonoids        | Flavanols             | 1.03      | 0.11 | 6.95                   | 9.39                  |
| Ligstroside-aglycone                | Other polyphenols | Tyrosols              | 1.03      | 0.08 | -6.95                  | -1.02                 |
| Sinapic acid                        | Phenolic acids    | Hydroxycinnamic acids | 1.02      | 0.18 | -6.95                  | -1.29                 |
| Bergapten                           | Other polyphenols | Furanocoumarins       | 1.02      | 0.05 | 2.57                   | 1.40                  |
| Avenanthramide 2p                   | Phenolic acids    | Hydroxycinnamic acids | 1.02      | 0.10 | -2.93                  | -0.89                 |
| Feruloyl tartaric acid              | Phenolic acids    | Hydroxycinnamic acids | 1.01      | 0.08 | 4.38                   | 2.80                  |
| 7-Hydroxymatairesinol               | Lignans           | Lignans               | 1.01      | 0.07 | 2.66                   | 1.36                  |
| Esculin                             | Other polyphenols | Hydroxycoumarins      | 1.01      | 0.13 | 1.00                   | -0.09                 |
| Episesaminol                        | Lignans           | Lignans               | 1.01      | 0.19 | 0.76                   | 0.33                  |
| Anhydro-secoisolariciresinol        | Lignans           | Lignans               | 1.00      | 0.06 | 2.63                   | 1.14                  |
| 3-Hydroxyphloretin 2'-O-glucoside   | Flavonoids        | Dihydrochalcones      | 1.00      | 0.26 | 6.95                   | 0.00                  |

Table S3. Selected VIP markers at 16 days

| Compound Name                       | Class             | Subclass              | VIP score | SE   | logFC<br>(COR vs Control) | logFC<br>(SA vs Control) |
|-------------------------------------|-------------------|-----------------------|-----------|------|---------------------------|--------------------------|
| Epirosmanol                         | Other polyphenols | Phenolic terpenes     | 1.14      | 0.11 | 2.94                      | 2.90                     |
| Conidendrin                         | Lignans           | Lignans               | 1.14      | 0.12 | 4.00                      | 0.00                     |
| 1-Acetoxy-pinorensin                | Lignans           | Lignans               | 1.14      | 0.13 | 4.00                      | 0.00                     |
| 3,4-Dihydroxyphenylglycol           | Other polyphenols | Other polyphenols     | 1.14      | 0.13 | 4.00                      | 0.00                     |
| Carnosol                            | Other polyphenols | Phenolic terpenes     | 1.14      | 0.11 | 3.35                      | 1.35                     |
| 5-5'-Dehydrodiferulic acid          | Phenolic acids    | Hydroxycinnamic acids | 1.13      | 0.10 | 3.02                      | -13.19                   |
| <i>p</i> -Coumaric acid ethyl ester | Phenolic acids    | Hydroxycinnamic acids | 1.09      | 0.25 | -4.00                     | 3.28                     |
| Luteolin 7-O-(2-apiosyl-glucoside)  | Flavonoids        | Flavones              | 1.09      | 0.19 | -4.00                     | 3.75                     |
| Gardenin B                          | Flavonoids        | Flavones              | 1.08      | 0.30 | -0.68                     | 2.73                     |
| Xanthohumol                         | Flavonoids        | Chalcones             | 1.08      | 0.19 | -4.00                     | 3.68                     |
| <i>p</i> -Anisaldehyde              | Other polyphenols | Hydroxybenzaldehydes  | 1.07      | 0.09 | -4.00                     | 4.56                     |
| Prodelphinidin dimer B3             | Flavonoids        | Flavanols             | 1.07      | 0.12 | -4.00                     | -13.19                   |
| 3- <i>p</i> -Coumaroylquinic acid   | Phenolic acids    | Hydroxycinnamic acids | 1.07      | 0.07 | -4.00                     | -13.19                   |
| <i>p</i> -Coumaroyl tartaric acid   | Phenolic acids    | Hydroxycinnamic acids | 1.06      | 0.10 | -4.00                     | -13.19                   |
| Sinapic acid                        | Phenolic acids    | Hydroxycinnamic acids | 1.05      | 0.17 | -4.00                     | -13.19                   |
| Hydroxytyrosol                      | Other polyphenols | Tyrosols              | 1.05      | 0.16 | -0.58                     | 1.44                     |
| Butein                              | Flavonoids        | Chalcones             | 1.04      | 0.10 | -4.00                     | 7.84                     |
| Feruloyl tartaric acid              | Phenolic acids    | Hydroxycinnamic acids | 1.04      | 0.09 | -1.27                     | -13.19                   |
| Anethole                            | Other polyphenols | Hydroxyphenylpropenes | 1.04      | 0.15 | 2.00                      | 3.94                     |
| Esculin                             | Other polyphenols | Hydroxycoumarins      | 1.03      | 0.08 | 0.94                      | -13.19                   |
| Lariciresinol-sesquillignan         | Lignans           | Lignans               | 1.03      | 0.34 | 2.26                      | 2.92                     |
| (+)-Galocatechin                    | Flavonoids        | Flavanols             | 1.03      | 0.13 | -0.94                     | -13.19                   |
| Resveratrol 3-O-glucoside           | Stilbenes         | Stilbenes             | 1.03      | 0.13 | 0.00                      | 13.19                    |
| 7-Hydroxymatairesinol               | Lignans           | Lignans               | 1.03      | 0.10 | -0.57                     | -13.19                   |
| Esculetin                           | Other polyphenols | Hydroxycoumarins      | 1.03      | 0.10 | 1.23                      | 5.19                     |
| Tetramethylscutellarein             | Flavonoids        | Flavones              | 1.03      | 0.08 | 0.09                      | 0.72                     |
| Episesaminol                        | Lignans           | Lignans               | 1.03      | 0.09 | 0.82                      | -13.19                   |
| Bergapten                           | Other polyphenols | Furanocoumarins       | 1.03      | 0.07 | 0.90                      | 1.28                     |
| Cyclolariciresinol                  | Lignans           | Lignans               | 1.02      | 0.41 | 4.00                      | 0.00                     |
| (+)-Catechin                        | Flavonoids        | Flavanols             | 1.02      | 0.07 | -0.06                     | -13.19                   |
| Hydroxycaffeic acid                 | Phenolic acids    | Hydroxycinnamic acids | 1.02      | 0.22 | 0.97                      | 3.52                     |
| Caffeic acid 4-O-glucoside          | Phenolic acids    | Hydroxycinnamic acids | 1.02      | 0.08 | 0.82                      | -13.19                   |
| 6-Prenylaringenin                   | Flavonoids        | Flavanones            | 1.02      | 0.08 | 0.18                      | -4.78                    |
| Ferulic acid 4-O-glucoside          | Phenolic acids    | Hydroxycinnamic acids | 1.02      | 0.08 | 0.20                      | -4.64                    |
| Sinensetin                          | Flavonoids        | Flavones              | 1.02      | 0.19 | 0.00                      | 13.19                    |
| (+)-Galocatechin 3-O-gallate        | Flavonoids        | Flavanols             | 1.02      | 0.11 | 0.77                      | -13.19                   |
| Avenanthramide 2p                   | Phenolic acids    | Hydroxycinnamic acids | 1.02      | 0.09 | 0.71                      | -13.19                   |
| Syringaldehyde                      | Other polyphenols | Hydroxybenzaldehydes  | 1.02      | 0.23 | 0.93                      | 3.61                     |
| Ferulic acid                        | Phenolic acids    | Hydroxycinnamic acids | 1.02      | 0.06 | 0.93                      | 1.32                     |
| Sesamol                             | Lignans           | Lignans               | 1.01      | 0.13 | -0.43                     | -13.19                   |
| Anhydro-secoisolariciresinol        | Lignans           | Lignans               | 1.00      | 0.12 | 0.53                      | -13.19                   |

Table S4. Selected VIP markers at 24 days

| Compound Name                       | Class             | Subclass               | VIP score | SE   | logFC<br>(COR vs Control) | logFC<br>(SA vs Control) |
|-------------------------------------|-------------------|------------------------|-----------|------|---------------------------|--------------------------|
| Esculetin                           | Other polyphenols | Hydroxycoumarins       | 1.20      | 0.10 | 2.05                      | 1.09                     |
| 3,4-Dihydroxyphenylglycol           | Other polyphenols | Other polyphenols      | 1.20      | 0.11 | 4.21                      | 0.25                     |
| Conidendrin                         | Lignans           | Lignans                | 1.18      | 0.10 | 2.98                      | 1.79                     |
| Epirosmanol                         | Other polyphenols | Phenolic terpenes      | 1.18      | 0.11 | 1.09                      | 0.33                     |
| Sinapaldehyde                       | Other polyphenols | Hydroxycinnamaldehydes | 1.17      | 0.11 | 1.17                      | -0.38                    |
| 5-5'-Dehydrodiferulic acid          | Phenolic acids    | Hydroxycinnamic acids  | 1.16      | 0.16 | 2.23                      | 0.55                     |
| Anethole                            | Other polyphenols | Hydroxyphenylpropenes  | 1.14      | 0.13 | -1.69                     | 1.32                     |
| Scopoletin                          | Other polyphenols | Hydroxycoumarins       | 1.14      | 0.34 | 6.32                      | 0.00                     |
| Carnosic acid                       | Other polyphenols | Phenolic terpenes      | 1.11      | 0.37 | 1.22                      | 1.37                     |
| 4-Hydroxycoumarin                   | Other polyphenols | Hydroxycoumarins       | 1.10      | 0.12 | 1.44                      | -0.20                    |
| 3,4-DHPEA-EDA                       | Other polyphenols | Tyrosols               | 1.05      | 0.09 | 0.27                      | -8.16                    |
| Hydroxycaffeic acid                 | Phenolic acids    | Hydroxycinnamic acids  | 1.05      | 0.26 | 0.86                      | 2.08                     |
| Syringaldehyde                      | Other polyphenols | Hydroxybenzaldehydes   | 1.04      | 0.33 | 0.82                      | 2.12                     |
| 3- <i>p</i> -Coumaroylquinic acid   | Phenolic acids    | Hydroxycinnamic acids  | 1.04      | 0.05 | -0.09                     | -8.16                    |
| Bergapten                           | Other polyphenols | Furanocoumarins        | 1.03      | 0.07 | -0.02                     | -1.42                    |
| Tetramethylscutellarein             | Flavonoids        | Flavones               | 1.03      | 0.09 | -1.89                     | 0.05                     |
| Ferulic acid                        | Phenolic acids    | Hydroxycinnamic acids  | 1.03      | 0.07 | -0.07                     | -1.43                    |
| Feruloyl tartaric acid              | Phenolic acids    | Hydroxycinnamic acids  | 1.02      | 0.08 | -6.32                     | -1.16                    |
| Ferulic acid 4-O-glucoside          | Phenolic acids    | Hydroxycinnamic acids  | 1.02      | 0.08 | -1.66                     | -0.21                    |
| 6-Prenylnaringenin                  | Flavonoids        | Flavanones             | 1.02      | 0.08 | -1.70                     | -0.25                    |
| 7-Hydroxymatairesinol               | Lignans           | Lignans                | 1.02      | 0.08 | -6.32                     | -1.85                    |
| Xanthohumol                         | Flavonoids        | Chalcones              | 1.02      | 0.63 | 6.32                      | 0.00                     |
| Caffeic acid 4-O-glucoside          | Phenolic acids    | Hydroxycinnamic acids  | 1.01      | 0.08 | -6.32                     | -3.04                    |
| Butein                              | Flavonoids        | Chalcones              | 1.01      | 0.16 | 6.32                      | 8.16                     |
| 4-Hydroxybenzoic acid 4-O-glucoside | Phenolic acids    | Hydroxybenzoic acids   | 1.01      | 0.09 | -6.32                     | -8.16                    |
| <i>p</i> -Coumaroyl tyrosine        | Phenolic acids    | Hydroxycinnamic acids  | 1.01      | 0.09 | -6.32                     | -8.16                    |
| Esculin                             | Other polyphenols | Hydroxycoumarins       | 1.01      | 0.09 | -2.18                     | -1.45                    |
| (+)-Galocatechin                    | Flavonoids        | Flavanols              | 1.01      | 0.10 | -6.32                     | -8.16                    |
| Avenanthramide 2p                   | Phenolic acids    | Hydroxycinnamic acids  | 1.01      | 0.10 | -3.09                     | -8.16                    |
| Pinocembrin                         | Flavonoids        | Flavanones             | 1.01      | 0.11 | -6.32                     | -8.16                    |
| Gardenin B                          | Flavonoids        | Flavones               | 1.01      | 0.11 | -6.32                     | -8.16                    |
| d-Viniferin                         | Stilbenes         | Stilbenes              | 1.01      | 0.13 | -6.32                     | -8.16                    |
| Episesaminol                        | Lignans           | Lignans                | 1.01      | 0.15 | -0.46                     | 0.56                     |
| Procyanidin dimer B1                | Flavonoids        | Flavanols              | 1.00      | 0.14 | -6.32                     | -8.16                    |
| Luteolin 7-O-(2-apiosyl-glucoside)  | Flavonoids        | Flavones               | 1.00      | 0.25 | 6.32                      | 8.16                     |
| Piceatannol                         | Stilbenes         | Stilbenes              | 1.00      | 0.12 | -0.95                     | -0.61                    |
